# Supplementary material for: Micropores of pure nanographite spheres for long cycle life and high-rate lithium–sulfur batteries
Source: Royal Society of Chemistry journal article supplement (doi:10.1039/c8ta08361d), 2018-01-01
Supplement: c8ta08361d1.pdf [file c8ta08361d1.pdf]

## Supporting Information

### Micropores of Pure Nanographite Spheres for Long-Cycle and High-Rate Lithium-sulfur Batteries

Kexuan Liao, Shuting Chen, Huanhuan Wei, Jinchen Fan<sup>a,b\*</sup>, Qunjie Xu<sup>a,b\*</sup>, Yulin Min<sup>a,b\*</sup>

<sup>a</sup>Shanghai Key Laboratory of Materials Protection and Advanced Materials in Electric Power, Shanghai University of Electric Power, Shanghai 200090, P. R. China

<sup>b</sup>Shanghai Institute of Pollution Control and Ecological Security, Shanghai 200092, P.R. China

E-mail: [Jinchen.fan@shiep.edu.cn](mailto:Jinchen.fan@shiep.edu.cn); [xuqunjie@shiep.edu.cn](mailto:xuqunjie@shiep.edu.cn); [ahaqmylin@126.com](mailto:ahaqmylin@126.com);

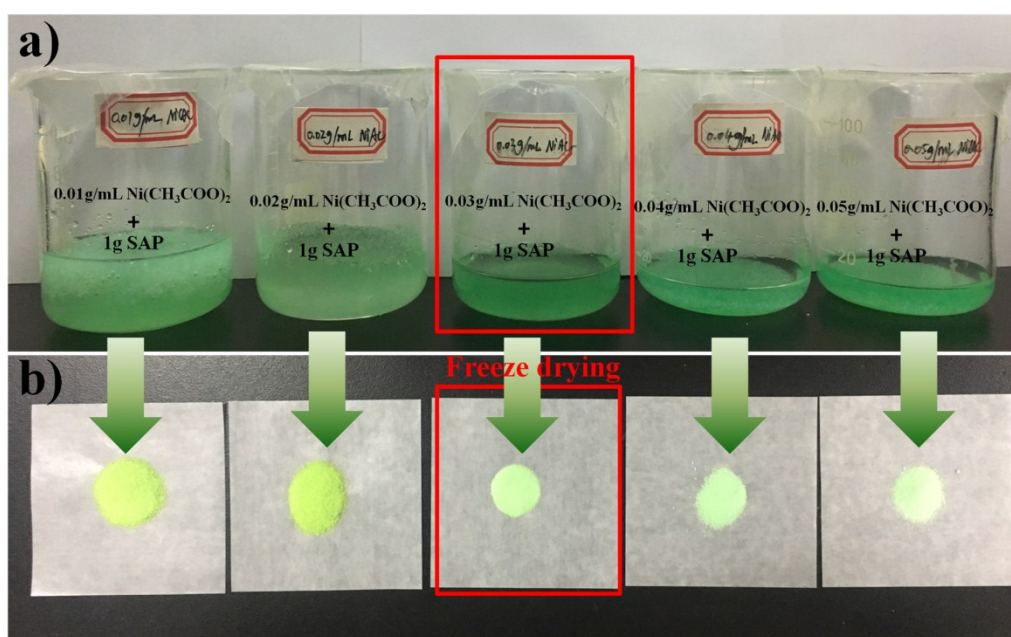

**Figure S1.** a) Photos of the hydrogels formed by adding nickel acetate solution of different concentration to SAP, b) photos of the freeze drying hydrogels before pyrolysis.

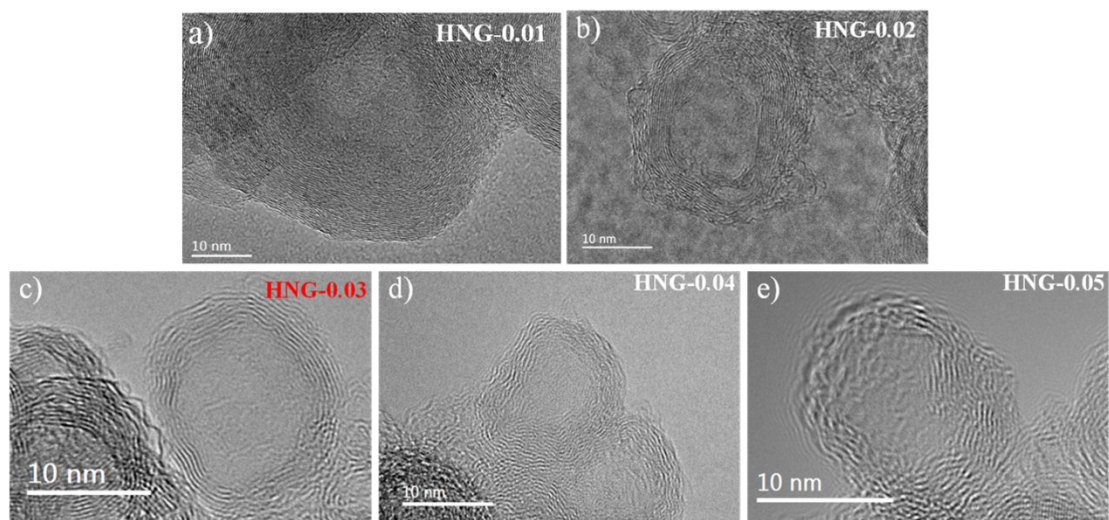

**Figure S2.** TEM images of HNG with different number of micropore. According to concentration of Ni in the precursor, a) HNG-0.01, HNG-0.02, HNG-0.03, HNG-0.04 and HNG-0.05.

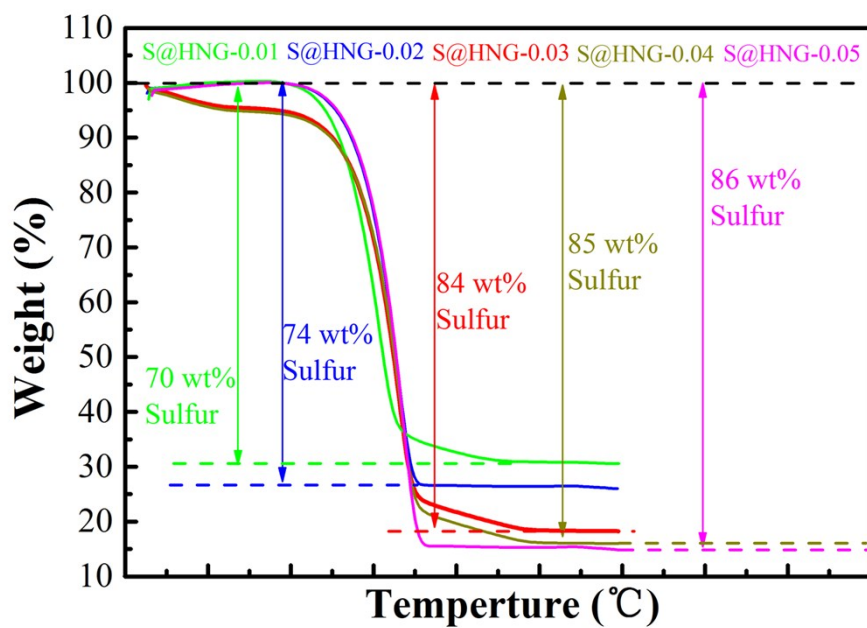

**Figure S3.** TG curves of S@HNG-0.01, S@HNG-0.02, S@HNG-0.03, S@HNG-0.04 and S@HNG-0.05

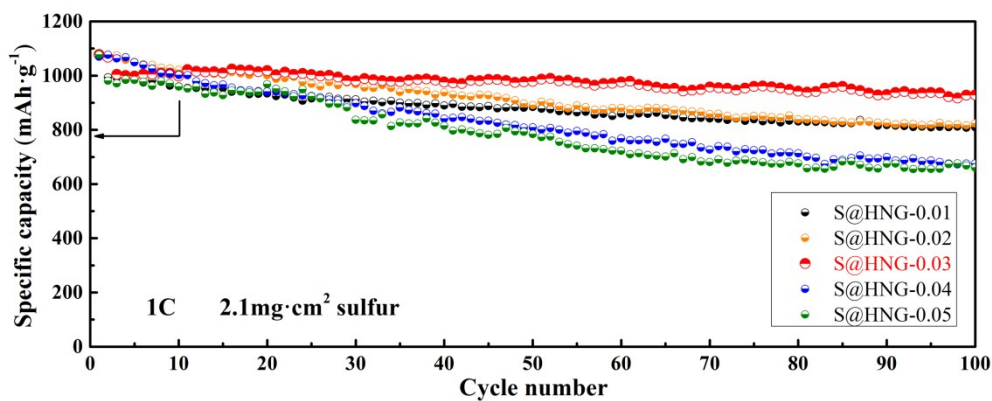

**Figure S4.** Cycling performance of S@HNG-0.01, S@HNG-0.02, S@HNG-0.03, S@HNG-0.04 and S@HNG-0.05 electrode at 1C over 100 cycles with 2.1 mg cm<sup>-2</sup> sulfur loading.

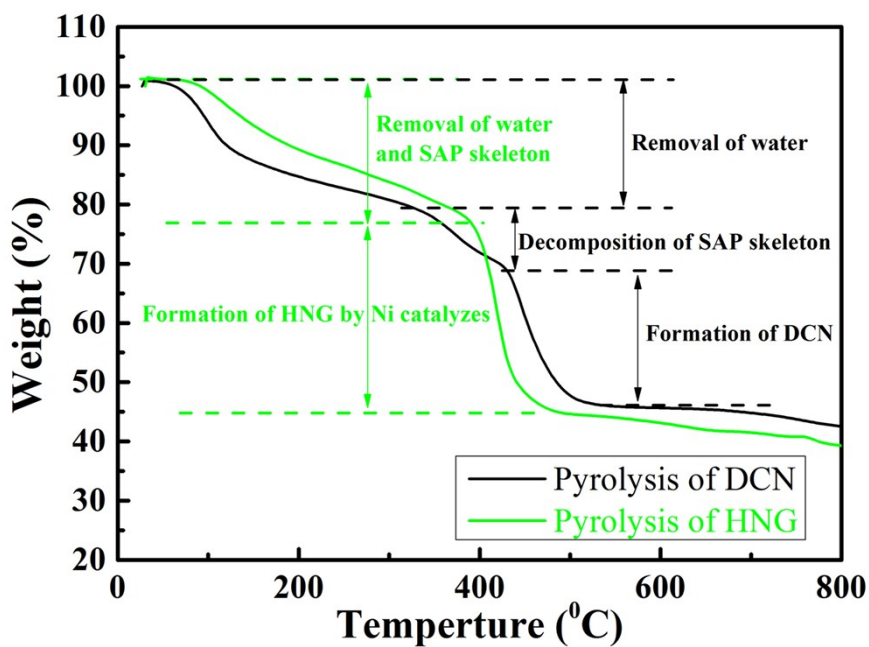

**Figure S5.** TG curves of the pyrolysis of DCN and HNG.



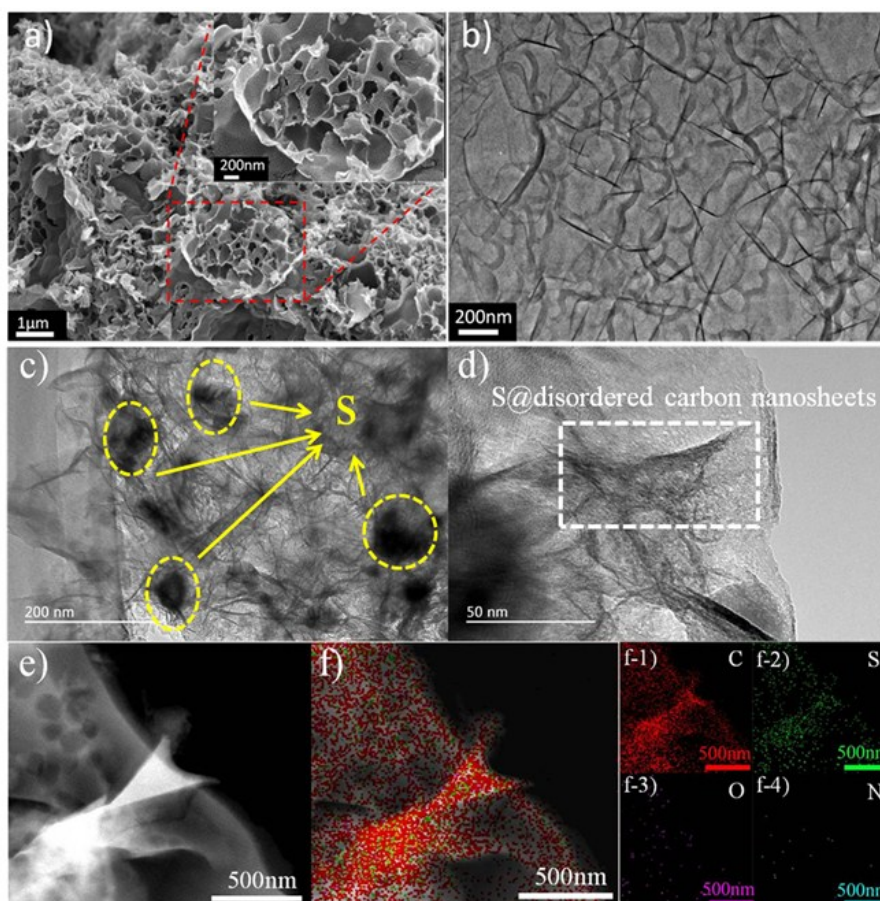

**Figure S6.** a) SEM image of DCN, b) TEM image of DCN, c) and d) TEM images of S@DCN, e) STEM image of S@DCN and f) corresponding EDS elemental mapping images of C, S, O and N.

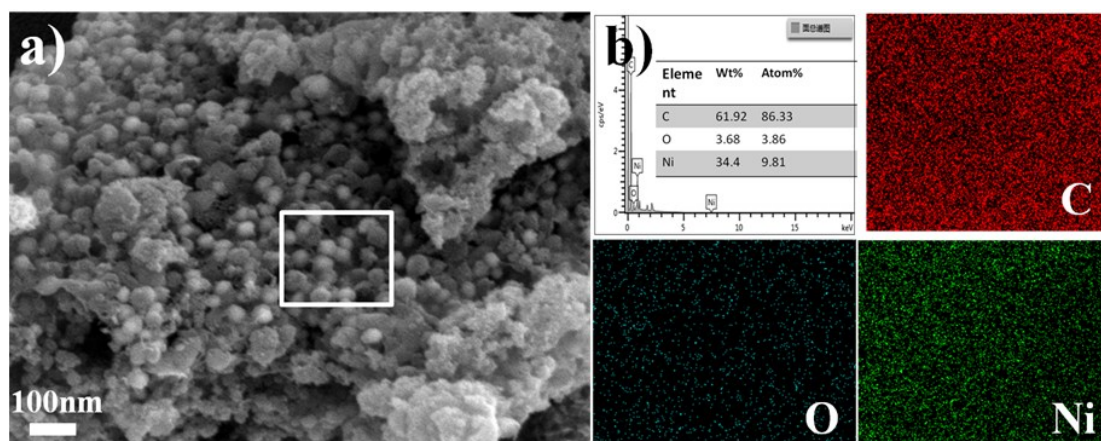

**Figure S7.** SEM images of Ni@HNG and the energy dispersive X-ray spectroscopy (EDS) corresponding the proportion of elements as well as elemental mapping images for C, O and Ni

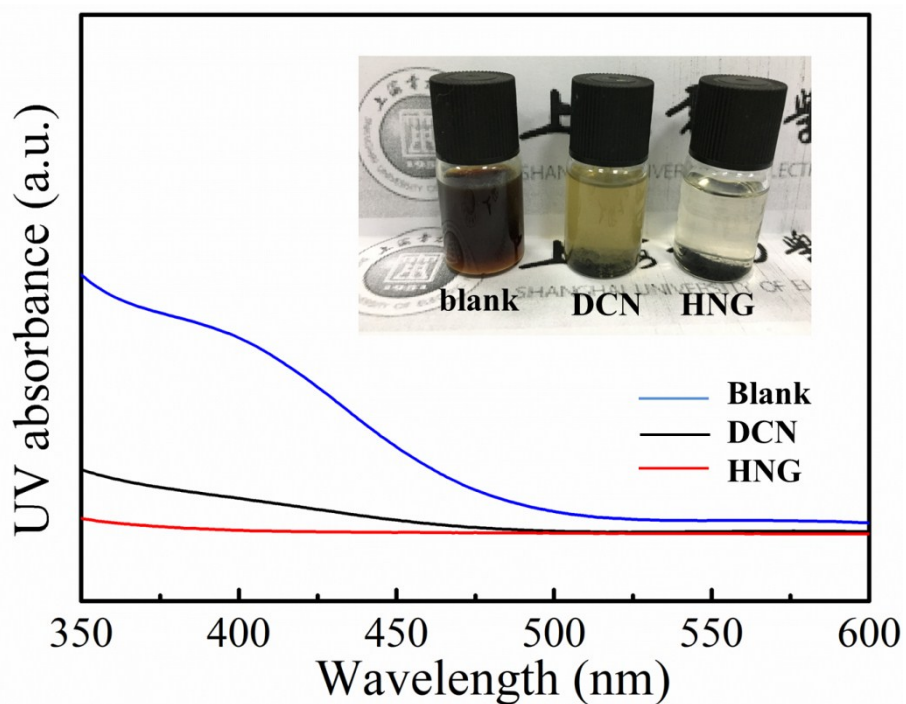

**Figure S8.** UV-vis absorption spectra of  $\text{Li}_2\text{S}_4$  solution before and after adding DCN or HNG and inset is polysulfide entrapment by the DCN and HNG.

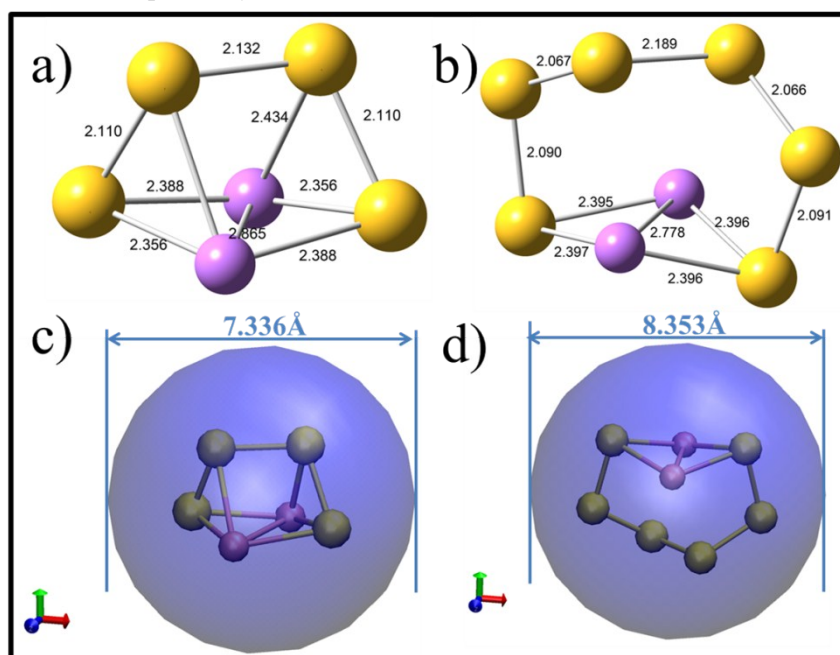

**Figure S9.** a) and b) the bond length of molecules of  $\text{Li}_2\text{S}_4$  and  $\text{Li}_2\text{S}_6$ , c) and d) the vander waals radius of molecules of  $\text{Li}_2\text{S}_4$  and  $\text{Li}_2\text{S}_6$

Table S1. Molar volume, farthest distance and diameter of  $\text{Li}_2\text{S}_4$  and  $\text{Li}_2\text{S}_6$ .

| Molecule                                                   | $\text{Li}_2\text{S}_4$ | $\text{Li}_2\text{S}_6$ |
|------------------------------------------------------------|-------------------------|-------------------------|
| <b>Molar volume (<math>\text{\AA}^3/\text{mol}</math>)</b> | 111.9                   | 221.0                   |
| <b>Farthest distance (<math>\text{\AA}</math>)</b>         | 3.736                   | 4.753                   |
| <b>Diameter of system (<math>\text{\AA}</math>)</b>        | 7.336                   | 8.353                   |

Table S2, Electrochemical performance comparison of S@HNG with the representative pure carbon sulfur host in literatures

| Sulfur hosts                                           | Sulfur content / wt% | Sulfur loading /mg cm <sup>-2</sup> | Rate performance        |                               | Cycling performance |                               | Ref.             |
|--------------------------------------------------------|----------------------|-------------------------------------|-------------------------|-------------------------------|---------------------|-------------------------------|------------------|
|                                                        |                      |                                     | Rate /C                 | Capacity /mAh g <sup>-1</sup> | Cycle No.           | Capacity /mAh g <sup>-1</sup> |                  |
| <b>HNG</b>                                             | <b>84.2</b>          | <b>2.1~5.0</b>                      | <b>10C</b><br><b>5C</b> | <b>450</b><br><b>626</b>      | <b>1000</b>         | <b>658</b>                    | <b>This work</b> |
| N-doped carbon sheets with additional cathodic coating | 60                   | 2.0                                 | 3                       | 615                           | 1000                | 472                           | S1               |
| Microporous carbon sheets                              | 70                   | 0.7~1.0                             | 4                       | 652                           | 500                 | 612                           | S2               |
| Honeycomb-like carbon sheets                           | 70                   | 0.7~0.84                            | 2                       | 580                           | 500                 | 505                           | S3               |
| Graphene-backboned carbon sheets                       | 64                   | 0.4~0.6                             | 4                       | 430                           | 400                 | 650                           | S4               |
| Amino-functionalized rGO                               | 60                   | -                                   | 4                       | 480                           | 350                 | 650                           | S5               |
| Carbon nanocages                                       | 79.8                 | 1.0~1.5                             | -                       | -                             | 300                 | 810                           | S6               |
| N-doped hollow carbon nanospheres                      | 85                   | 0.5~0.7                             | 2                       | 250                           | -                   | -                             | S7               |
| 3D grapheme nanosheet@carbon nanotube                  | 70                   | 1.1~1.5                             | 2                       | 458                           | 500                 | 364                           | S8               |
| MWNTs into hollow porous carbon nanotubes              | 71                   | -                                   | 3                       | 550                           | 200                 | 647                           | S9               |
| Activated porous carbon nanotube                       | 75                   | 2.2                                 | 5                       | 857                           | -                   | -                             | S10              |

## Supporting Reference

- [1] S. Z. Niu, W. Lv, G. M. Zhou, H. F. Shi, X. Y. Qin, C. Zheng, T. H. Zhou, C. Luo, Y. Q. Deng, B. H. Li, F. Y. Kang, Q. H. Yang, *Nano Energy* **2016**, *30*, 138.
- [2] B. He, W. C. Li, C. Yang, S. Q. Wang, A. H. Lu, *ACS Nano* **2016**, *10*, 1633.
- [3] S. K. Park, J. Lee, T. Hwang, B. Jang, Y. Piao, *ACS Appl. Mater. Inter.* **2017**, *9*, 2430.
- [4] Y. Dong, S. Liu, Z. Wang, Y. Liu, Z. Zhao, J. Qiu, *Nanoscale* **2015**, *7*, 7569.
- [5] Z. Wang, Y. Dong, H. Li, Z. Zhao, H. B. Wu, C. Hao, S. Liu, J. Qiu, X. W. Lou, *Nat. Commun.* **2014**, *5*, 5002.
- [6] Z. Y. Lyu, D. Xu, L. J. Yang, R. C. Che, R. Feng, J. Zhao, Y. Li, Q. Wu, X. Z. Wang, Z. Hu, *Nano Energy* **2015**, *12*, 657–665.
- [7] W. D. Zhou, C. M. Wang, Q. L. Zhang, H. D. Abruna, Y. He, J. W. Wang, S. X. Mao, X. C. Xiao, *Adv. Energy Mater.* **2015**, *5*, 1401752.
- [8] Z. Li, L. Yuan, Z. Yi, Y. Sun, Y. Liu, Y. Jiang, Y. Shen, Y. Xin, Z. Zhang, Y. Huang, *Adv. Energy Mater.* **2014**, *4*, 1301473.
- [9] Y. Zhao, W. L. Wu, J. X. Li, Z. C. Xu, L. H. Guan, *Adv. Mater.* **2014**, *26*, 5113–5118.
- [10] J. S. Lee, J. Jun, J. Jang, A. Manthiram, *Small* **2017**, *13*, 1602984.
